# Supplementary material for: Impact of wormlike micelles on nano and macroscopic structure of TEMPO-oxidized cellulose nanofibril hydrogels
Source: Royal Society of Chemistry journal article supplement (doi:10.1039/d0sm00135j), 2020-01-01
Supplement: d0sm00135j1.pdf [file d0sm00135j1.pdf]

## Supplementary Information

# Impact of wormlike micelles on nano and macroscopic structure of TEMPO-oxidized cellulose nanofibrils hydrogels

Marcelo A. da Silva, Vincenzo Calabrese, Julien Schmitt, Kazi M. Zakir Hossain,  
Saffron J. Bryant, Najet Mahmoudi, Janet L. Scott, Karen J. Edler

Figure ES1 – Surface tension dependence on CAPOX concentration in NaCl 1wt% solutions.

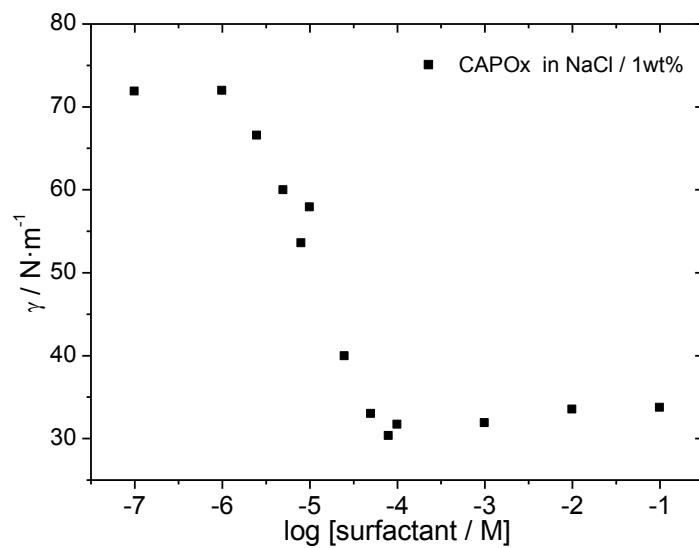

Table ESI 1A Fitting parameters for CAPB 20, 40 and 60 mM in NaCl 1wt% in 100 %  
D<sub>2</sub>O

| Concentration<br>Surfactant         | 20 mM | 40 mM      | 60 mM      |
|-------------------------------------|-------|------------|------------|
| CAPB                                |       |            |            |
| Scale ( $\alpha n [\Delta\rho]^2$ ) | 1.22  | 2.48       | 3.75       |
| R / Å                               | 24±1  | 24 (fixed) | 24 (fixed) |
| $\sigma$ / %                        | 15 ±1 | 15 (fixed) | 15 (fixed) |
| Interactions (hard-spheres)         |       |            |            |
| $\phi_{HS}$ / %                     | 0     | 1.3 ±0.1   | 2.4 ±0.1   |
| R <sub>HS</sub> / Å                 | N/A   | 36 ± 1     | 32 ± 1     |

Table ESI 1B Fitting parameters for CAPOx 20, 40 and 60 mM in NaCl 1wt% in 100  
% D<sub>2</sub>O

| Concentration<br>Surfactant         | 20 mM | 40 mM      | 60 mM      |
|-------------------------------------|-------|------------|------------|
| CAPOx                               |       |            |            |
| Scale ( $\alpha n [\Delta\rho]^2$ ) | 1.32  | 2.64       | 4.16       |
| R / Å                               | 23±1  | 23 (fixed) | 23 (fixed) |
| $\sigma$ / %                        | 17 ±1 | 17 (fixed) | 17 (fixed) |
| Interactions (hard-spheres)         |       |            |            |
| $\phi_{HS}$ / %                     | 0     | 0          | 2.9 ±0.1   |
| R <sub>HS</sub> / Å                 | N/A   | N/AN/A     | 31 ± 1     |

Table ESI 1C Fitting parameters for SLS 20, 40 and 60 mM in NaCl 1wt% in 100 %  
D<sub>2</sub>O

| Concentration<br>Surfactant                       | 20 mM          | 40 mM          | 60 mM          |
|---------------------------------------------------|----------------|----------------|----------------|
| SLS                                               |                |                |                |
| Scale ( $\alpha n [\Delta\rho]^2$ )               | 2.24           | 1.78           | 1.62           |
| R / Å                                             | 19±1           | 19±1           | 19±1           |
| Interactions (Hayter – mean sphere approximation) |                |                |                |
| Charge / e                                        | 54 (fixed)     | 54 (fixed)     | 54±2           |
| Vol. frac / %                                     | 0.23±0.01      | 0.62±0.01      | 1.05±0.01      |
| Dielectric constant                               | 77.936 (fixed) | 77.936 (fixed) | 77.936 (fixed) |
| Salt concentration /<br>M                         | 0.173 (fixed)  | 0.173 (fixed)  | 0.173 (fixed)  |
| Temperature / K                                   | 298.16 (fixed) | 298.16 (fixed) | 298.16 (fixed) |

Table ESI 2A Fitting parameters for CAPB/SDS 20/20, 40/40 and 60/60 mM in NaCl  
1wt% in 100 % D<sub>2</sub>O

| Concentration<br>Surfactant               | 20 mM  | 40 mM         | 60 mM         |
|-------------------------------------------|--------|---------------|---------------|
| CAPB/SDS                                  |        |               |               |
| Scale ( $\alpha n [\Delta\rho]^2$ )       | 0.05   | 0.10          | 0.17          |
| R / Å                                     | 18±1   | 18 (fixed)    | 18 (fixed)    |
| $\sigma$ / %                              | 19 ±1  | 19 ±1 (fixed) | 19 ±1 (fixed) |
| Interactions (Random Phase Approximation) |        |               |               |
| $V_{RPA}$                                 | 16.2±1 | 45 ±1         | 82 ±0.1       |
| $R_c$ / Å                                 | 49 ±1  | 50 ± 1        | 46 ± 1        |

Table ESI 2B Fitting parameters for CAPOx/SDS 20/20, 40/40 and 60/60 mM in  
NaCl 1wt% in 100 % D<sub>2</sub>O

| Concentration<br>Surfactant               | 20 mM   | 40 mM         | 60 mM         |
|-------------------------------------------|---------|---------------|---------------|
| CAPOx/SDS                                 |         |               |               |
| Scale ( $\alpha n [\Delta\rho]^2$ )       | 0.05    | 0.10          | 0.15          |
| R / Å                                     | 18±1    | 18 (fixed)    | 18 ±1 (fixed) |
| $\sigma$ / %                              | 19 ±1   | 19 ±1 (fixed) | 19 ±1 (fixed) |
| Interactions (Random Phase Approximation) |         |               |               |
| $V_{RPA}/\pm 1b$                          | 64 ±0.1 | 95 ±0.1       | 145 ±0.1      |
| $R_c / \pm 0.1 \text{ Å}$                 | 32 ± 1  | 35 ± 1        | 37 ± 1        |

Table ESI 2C Fitting parameters for CAPB/SLS 20/20, 40/40 and 60/60 mM in NaCl  
1wt% in 100 % D<sub>2</sub>O

| Concentration<br>Surfactant         | 20 mM          | 40 mM          | 60 mM          |
|-------------------------------------|----------------|----------------|----------------|
| CAPB/SLS                            |                |                |                |
| Scale ( $\alpha n [\Delta\rho]^2$ ) | 2.69           | 2.18           | 1.54           |
| R / Å                               | 22 (fixed)     | 22 (fixed)     | 22 ±1          |
| Interactions (charged-spheres)      |                |                |                |
| Charge / e                          | 76 (fixed)     | 76 (fixed)     | 76±1           |
| Vol. frac / %                       | 0.8±0.1        | 1.5±0.1        | 2.2±0.1        |
| Dielectric constant                 | 77.936 (fixed) | 77.936 (fixed) | 77.936 (fixed) |
| Salt concentration /<br>M           | 0.173 (fixed)  | 0.173 (fixed)  | 0.173 (fixed)  |
| Temperature / K                     | 298.16 (fixed) | 298.16 (fixed) | 298.16 (fixed) |

Table ESI 3A Fitting parameters for the OCNF contribution in CAPB/SDS 20/20, 40/40 and 60/60 mM in OCNF 1wt%/NaCl 1wt% in 15wt% D<sub>2</sub>O / 75wt% H<sub>2</sub>O

| Concentration<br>Surfactant               | 20 mM      | 40 mM        | 60 mM        |
|-------------------------------------------|------------|--------------|--------------|
| CAPB                                      |            |              |              |
| Scale ( $\propto n [\Delta\rho]^2$ )      | 0.0098     | 0.0085       | 0.0068       |
| R / Å                                     | 53±1       | 53 (fixed)   | 53 (fixed)   |
| $\epsilon$                                | 0.24 ±0.02 | 0.24 (fixed) | 0.24 (fixed) |
| Interactions (Random Phase Approximation) |            |              |              |
| $V_{RPA}$                                 | -1.9±0.1   | -1.9 (fixed) | -1.9 (fixed) |
| $R_c$ / Å                                 | 65±1       | 65 (fixed)   | 65 (fixed)   |
